# Supplementary material for: Immune characteristics and clinical significance of peripheral blood lymphocytes in breast cancer
Source: Springer Nature journal article supplement (doi:10.1186/s12885-024-11815-8), 2024-01-09
Supplement: MOESM1 [file 26610190]

## Supplementary Figure

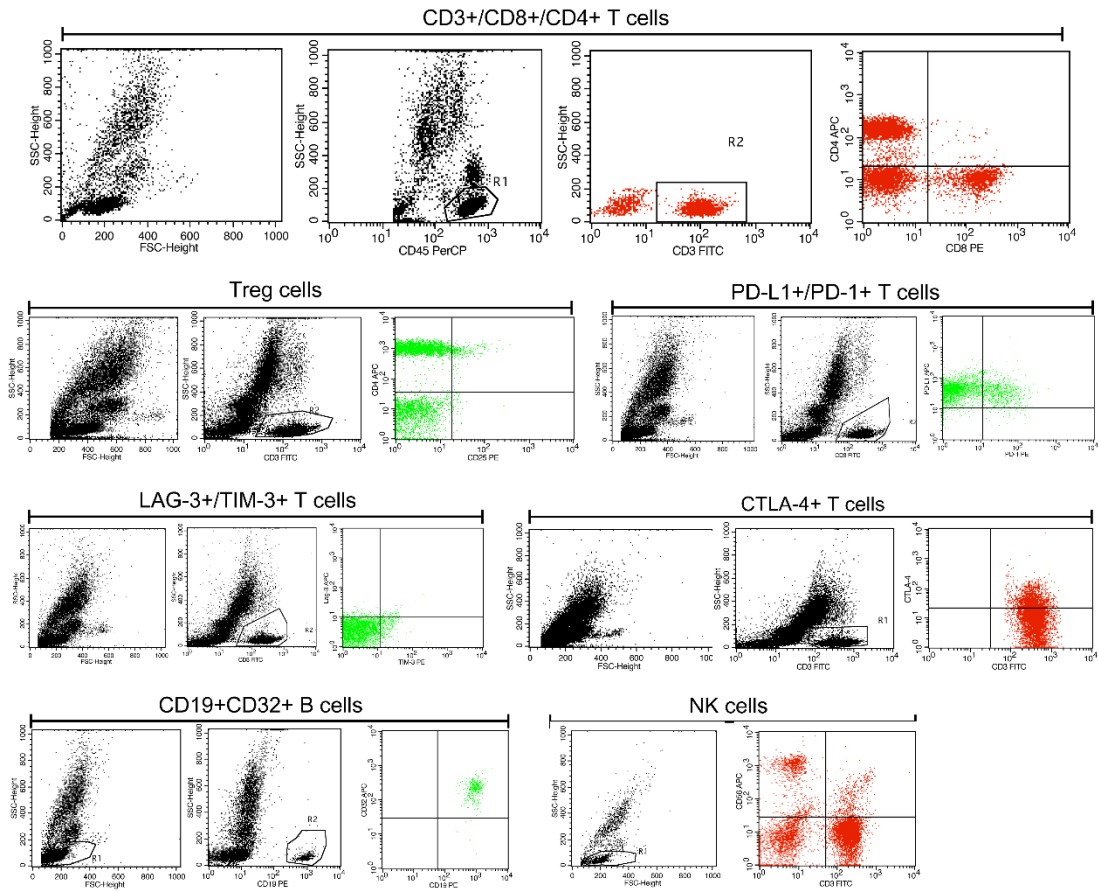

**Supplementary Figure 1. Identification of representative gating strategies for PBL subsets.** An overview of gating strategies for flow cytometry experiments.

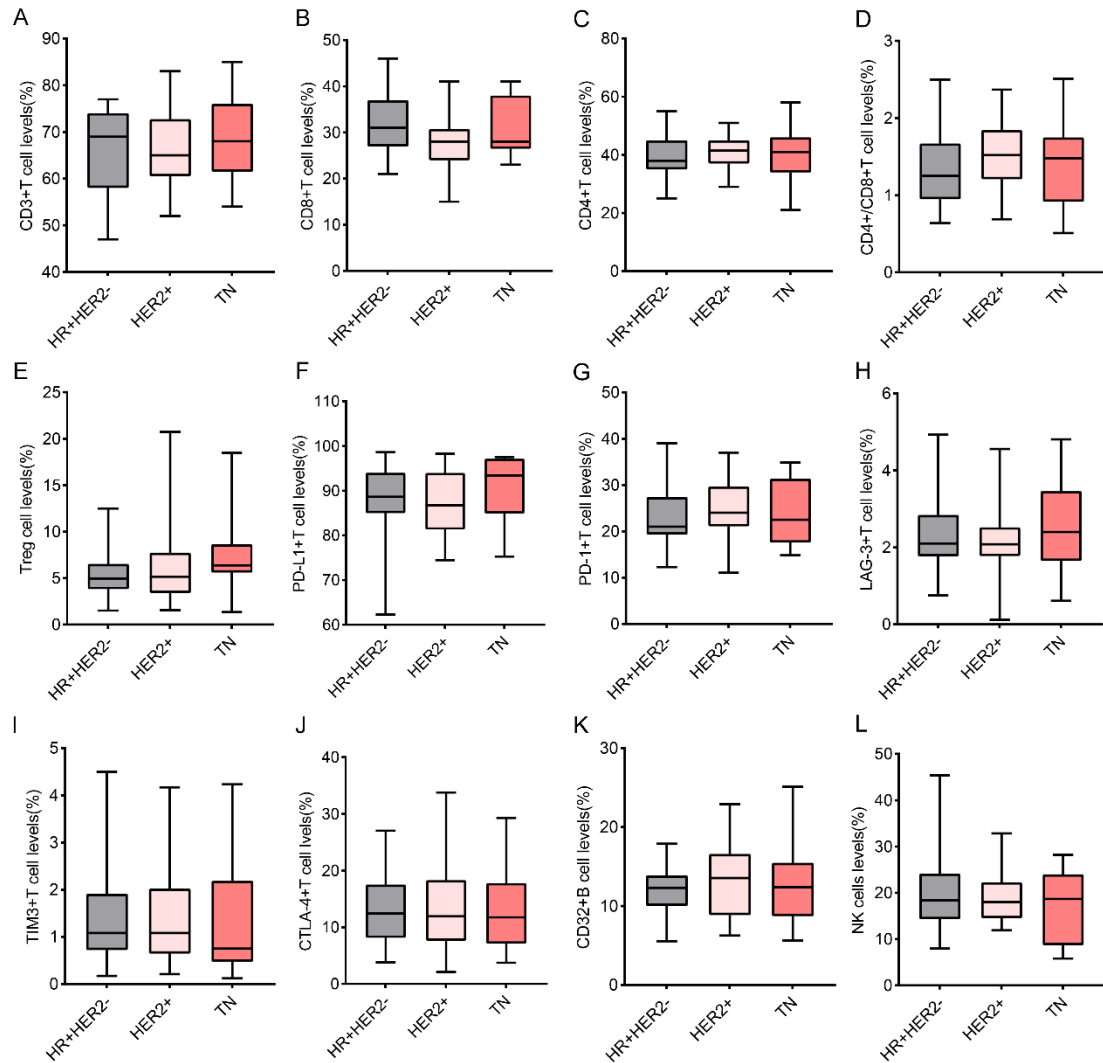

**Supplementary Figure 2. The Box plot of baseline PBLs levels in different molecular subtypes.**

(A)-(L) Levels of CD3+T (A), CD8+T(B), CD4+T(C), CD4+/CD8+T(D), Treg(E), PD-L1+T(F), PD-1+T(G), LAG-3+T(H), TIM3+T(I), CTLA-4+T(J), CD32+B(K), NK(L) in three molecular subtypes (HR+HER2-, HER2+, TN) of BC. Abbreviations: HR+HER2-, hormone receptor-positive/ HER2-negative; HER2+, HER2-positive; TN, triple-negative; BC, breast cancer.
